# Supplementary material for: The association between high mobility group box 1 chromatin protein and mitotic chromosomes in glioma cells
Source: PubMed Central journal article supplement — Oncol Lett. 2019 Dec 2;19(1):745–52. doi: 10.3892/ol.2019.11170 (PMC6924194; doi:10.3892/ol.2019.11170), 2019-12-02

Figure S1. HMGB1 expression in HA1800 astrocytes and glioma cell lines. (A) HMGB1 protein expression was analysed by western blotting. (B) Bar graph displaying the mean protein band intensity of the four cell lines (mean  $\pm$  SD; n=6). No significant difference in HMGB1 expression was observed between the four cell lines. HMGB1, high mobility group box 1.

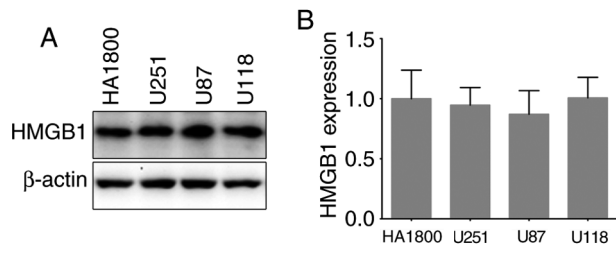

Supplement: Supplementary_Data.pdf [file Supplementary_Data.pdf]
